# Supplementary material
Source: Springer Nature journal article supplement (https://www.springermedizin.de/resource/supplementary/12874_2011_869_MOESM1_ESM.pdf/9432624)
Supplement: MOESM1 [file 9432624]

- a. PubMed, HTA, Cochrane Methodology register (through Oct. 29, 2010): N = 612
  - b. EMBASE (1980 to Oct. 30, 2010): N = 930
  - c. CINAHL (EBSCO) (1981 to Oct. 30, 2010): N = 188
  - d. PubMed related-links for 3 references(16,20,66): N = 762
  - e. CONSORT Database (Up to Oct 30<sup>th</sup>, 2010): N = 0 additional citations
  - f. Text books: N = 5
- Total N = 2497 titles and abstracts reviewed

- 462 excluded due to being duplicates
- 1450 excluded due to being systematic reviews of interventions
- 135 excluded due to not being on clinical heterogeneity

Expert contact: N = 5 unique papers  
Reference list review: N = 1 unique paper

456 full texts reviewed for inclusion

- 12 not related to SRs of controlled trials
- 2 not available
- 1 duplicate
- 340 excluded due to not offering suggestions related to clinical heterogeneity

101 included
